## 12 Summary

- 13 ● The circadian clock system is widely conserved in plants; however, divergence in  
14 circadian rhythm properties is poorly understood. We conducted a comparative  
15 analysis of the circadian properties of closely related duckweed species.
- 16 ● Using a particle bombardment method, a circadian bioluminescent reporter was  
17 introduced into duckweed plants. We measured bioluminescence circadian rhythms  
18 of eight species of the genus *Lemna* and seven species of the genus *Wolffiella* at  
19 various temperatures (20, 25, and 30 °C) and light conditions (constant light or  
20 constant dark). *Wolffiella* species inhabit relatively warm areas and lack some  
21 tissues/organs found in *Lemna* species.
- 22 ● *Lemna* species tended to show robust bioluminescence circadian rhythms under all  
23 conditions, while *Wolffiella* species showed lower rhythm stability, especially at  
24 higher temperatures. For *Lemna*, two species (*L. valdiviana* and *L. minuta*) forming  
25 a clade showed relatively lower circadian stability. For *Wolffiella*, two species (*W.*  
26 *hyalina* and *W. repanda*) forming a clade showed extremely long period lengths.
- 27 ● The circadian properties of species primarily reflect their phylogenetic positions.  
28 The relationships between geographical and morphological factors and circadian  
29 properties are also suggested.

30

## 31 Keywords

32 circadian rhythm, duckweed, interspecific divergence, *Lemna*, phylogeny, temperature,  
33 *Wolffiella*

34

## 35 Introduction

36 Circadian clocks are endogenous timekeeping systems that allow organisms to  
37 anticipate the daily and seasonal changes surrounding them. Many organisms, from  
38 cyanobacteria to humans, have a circadian clock with a period of approximately 24 h, and  
39 the circadian clock modulates the timing of various physiological phenomena. The  
40 circadian clock of a plant under day-night cycles is synchronized to diurnal changes in  
41 external information, such as light, dark, and temperature, and this regulates many  
42 physiological processes including leaf movement, stomatal opening and closing, and petal  
43 opening (Inoue *et al.*, 2018). In *Arabidopsis thaliana*, more than 20 clock-related  
44 components have been identified (Hsu & Harmer, 2014). The core circadian clock genes,  
45 including *CIRCADIAN CLOCK ASSOCIATED 1 (CCA1)* and *PSEUDO-RESPONSE*  
46 *REGULATOR (PRR)* family genes, *GIGANTEA (GI)*, *LUXARRHYTHMO (LUX)*, *EARLY*  
47 *FLOWERING 3 (ELF3)*, and *EARLY FLOWERING 4 (ELF4)*, form a regulatory network  
48 with transcription-translation feedback loops (Pokhilko *et al.*, 2012; Nohales & Kay,  
49 2016; Sanchez *et al.*, 2020). These genes have been identified in species as diverse as  
50 green algae (*Ostreococcus tauri*), charophytes, moss (*Physcomitrella patens*), and many  
51 higher plants (Song *et al.*, 2010; Linde *et al.*, 2017). Indeed, from algae to eudicots,  
52 diurnal transcriptomes are remarkably similar despite the large phylogenetic distances  
53 and differences in morphological complexity and habitat (Ferrari *et al.*, 2019). Thus, the  
54 circadian clock mechanisms studied in *Arabidopsis* are widely conserved in the plant  
55 kingdom. Despite this, even within the same species, *Arabidopsis thaliana*, a latitudinal  
56 cline has been observed in the period which displays a large natural variation (Michael *et*  
57 *al.*, 2003). By comparing leaf movements, Müller *et al.* showed that the circadian clock  
58 of cultivated tomato species runs more slowly than that of its wild relatives (Müller *et al.*,

59 2016). These results suggest that circadian phenomena display variations important for  
60 local adaptation. Plants have evolved to adapt to external environments, resulting in a  
61 variety of natural variations (Müller *et al.*, 2016; Greenham *et al.*, 2017). The light and  
62 temperature conditions experienced by plants are largely dependent on local climate, and  
63 light and temperature are well-known input signals for plant circadian clocks (Inoue *et*  
64 *al.*, 2018). While natural variations in plant circadian properties have been analyzed for  
65 strains/accessions distributed across relatively similar climatic environments, this has not  
66 been done for species distributed across regions with dramatically different climates.

67 Lemnaceae, commonly known as duckweed, is a group of small aquatic  
68 monocotyledonous plants widely distributed in tropical, arid, temperate, and subarctic  
69 areas. Duckweed includes 36 species representing the five genera *Spirodela*, *Landoltia*,  
70 *Lemna*, *Wolffiella*, and *Wolffia* (Sree *et al.*, 2016; Bog *et al.*, 2020). Morphologically,  
71 duckweed is traditionally classified into two groups—Lemnoideae, which includes the  
72 genera *Spirodela*, *Landoltia*, and *Lemna*; and Wolffioideae, which includes the genera  
73 *Wolffiella* and *Wolffia* (Landolt, 1986). Lemnoideae species have nerves (leaf veins) and  
74 roots and two budding pouches in a frond (leaf-like structure). In contrast, Wolffioideae  
75 species lack nerves and roots and have one budding pouch in a frond (Les *et al.*, 1997).  
76 Lemnoideae species are widely distributed from low to high latitudes, whereas  
77 Wolffioideae species are mainly found in low-latitude areas. Duckweed has been used for  
78 physiological studies since the 1950s because of its size and rapid growth (Acosta *et al.*,  
79 2021). With respect to circadian rhythm studies, *Lemna* plants have been used for the  
80 analysis of physiological rhythms and molecular studies on the circadian clock machinery  
81 (Miyata & Yamamoto, 1969; Hillman, 1970; Kondo & Tsudzuki, 1978). Clock-related  
82 genes, including *LHYs*, *PRRs*, *GIGANTIA (GI)*, and *EARLY FLOWERING3 (ELF3)*, have

83 been identified in several duckweed plants (Miwa *et al.*, 2006; Michael *et al.*, 2021). To  
84 observe circadian rhythms in duckweed, bioluminescence monitoring systems have been  
85 used (Miwa *et al.*, 2006; Serikawa *et al.*, 2008). A bioluminescence reporter, in which  
86 the firefly luciferase gene was driven by the *Arabidopsis CCA1* promoter  
87 (*AtCCA1::LUC+*), was introduced into duckweed using particle bombardment, and the  
88 bioluminescence of the plants grown on a luciferin-containing medium was automatically  
89 monitored for a week or more (Muranaka & Oyama, 2016). Using the bioluminescence  
90 monitoring system, a comparative analysis of circadian rhythms in nine strains of  
91 duckweed representing five species and four genera (*Spirodela*, *Landoltia*, *Lemna*, and  
92 *Wolffia*) was performed (Muranaka *et al.*, 2015). Based on the results of this previous  
93 study, under light/dark conditions, *AtCCA1::LUC+* reporter activity showed diurnal  
94 rhythms peaking in the early morning in each strain. Under constant light conditions,  
95 *AtCCA1::LUC+* reporter activity showed more variable rhythmic behavior, specifically  
96 robust/mildly-dampened rhythms in strains of *Spirodela polyrhiza*, *Landoltia punctata*,  
97 and *Lemna gibba*, and the Nd strain of *Lemna aequinoctialis*; unstable rhythms in *Wolffia*  
98 *columbiana*; and severely dampened rhythms in the 6746 strain of *Lemna aequinoctialis*.  
99 Thus, even within the same species, different circadian behaviors are observed.  
100 Furthermore, under constant dark conditions, *AtCCA1::LUC+* reporter activity showed  
101 dampened circadian rhythms in all strains. The period length was also longer under  
102 constant dark conditions than under constant light conditions in all strains except *Wolffia*  
103 *columbiana*. These results suggest that circadian properties, such as period length and  
104 stability, widely vary among duckweed plants and may be optimized for specific  
105 environmental conditions. Interestingly, *Wolffia australiana* has been reported to carry  
106 approximately half the numbers of light-signaling and circadian clock genes than

107 *Spirodela polyrhiza* (Michael *et al.*, 2021). Circadian systems of *Wolffia* species may have  
108 dramatically diversified when the genus arose. Taken together, interspecific divergence  
109 found in the circadian properties of duckweed plants seems to occur at different  
110 phylogenetic levels. It is not yet known, however, how these circadian properties are  
111 geographically related between different duckweed habitats.

112 In this study, we aimed to capture the interspecific divergence in the circadian properties  
113 of duckweed plants. We focused on two genera, *Lemna* (Lemnoideae) and *Wolffiella*  
114 (Wolffioideae). Among the Lemnoideae, the genus *Spirodela* has two species and the  
115 genus *Landoltia* has only one species; the *Lemna* genus contains 12 species, which makes  
116 it highly suitable for comparing interspecific divergence in circadian properties (Acosta  
117 *et al.*, 2021). In Wolffioideae, the sizes of *Wolffiella* plants are larger than those of *Wolffia*,  
118 which are too small to handle experimentally. It has been reported that the habitats of  
119 these genera overlap in various combinations (Landolt, 1986). Species in each genus were  
120 selected to cover their full distributional ranges. We characterized circadian rhythms in  
121 eight *Lemna* species and seven *Wolffiella* species by monitoring bioluminescence  
122 circadian reporters under constant and light/dark-entrainment conditions at different  
123 temperatures (20, 25, and 30 °C). We show that while every species has the potential for  
124 self-sustained oscillation and entrainability, the stability of circadian rhythms was highly  
125 dependent on phylogeny. Based on our results, we suggest that the circadian properties of  
126 *Lemnaceae* are phylogenetically restricted rather than geographically restricted.

127

## 128 Materials and Methods

### 129 Plant materials and growth conditions

130 *Wolffiella lingulata* 7547 and *W. oblonga* 7201 were provided by the Rutgers

131 Duckweed Stock Cooperative (<http://www.ruduckweed.org/>); *W. caudata* 9139, *W.*  
132 *neotropica* 7279, *W. welwitschii* 7644, *W. hyalina* 9525, *W. repanda* 9122, *Lemna obscura*  
133 8892, *L. turionifera* 6619, *L. japonica* 8695, *L. disperma* 7767, *L. valdiviana* 9475, and  
134 *L. minuta* 9476 strains were provided by the Landolt Duckweed Collection (Dr. Walter  
135 Lämmler, <http://www.duckweed.ch/>); *L. minor* 5512 was provided by Dr. Masaaki  
136 Morikawa (Hokkaido University). The *L. gibba* p8L strain is a pure line (eight generations  
137 of selfing) produced from the *L. gibba* 7741 (G3) strain (Muranaka *et al.*, 2015). All plants  
138 were aseptically kept on modified NF medium with 1% sucrose and 5 mM MES [2-(N-  
139 morpholino)- ethanesulfonic acid] as previously described for *L. gibba* (Muranaka *et al.*,  
140 2015). Plants were cultured in 8 ml of NF medium with continuous light at  $25 \pm 1$  °C,  
141 with light supplied by fluorescent lamps (FLR40SEXW/M/36-HG; NEC) at  
142 approximately  $50 \mu\text{mol m}^{-2} \text{s}^{-1}$ .

143 In the growth experiment, the plants were precultured in Bio Multi Incubator  
144 (LH-30-8CT; NK system) under a 12 h light/12 h dark cycle for two days. The light  
145 intensity was approximately  $40 \mu\text{mol m}^{-2} \text{s}^{-1}$  with a fluorescent lamp (FML13EX-N  
146 DK10; Hitachi), and the temperature was maintained at either 20, 25, or 30 °C. After  
147 preculture, the plants were placed in 12-well plates (one colony per well) with 4 ml of NF  
148 medium and grown under constant light conditions at each experimental temperature.  
149 After one week, the number of plant colonies in each well was counted.

150

## 151 Luciferase reporter constructs

152 We used *pUC-AtCCA1::intron-LUC+::NosT (AtCCA1::LUC+)* (Watanabe *et al.*,  
153 2021) and *pUC18 pAtCCR2::intronLUC+::NosT (AtCCR2::LUC+)* as circadian  
154 bioluminescent reporters. The promoter region of the *Arabidopsis CCR2* gene was

155 amplified by PCR with the genomic DNA template (*Arabidopsis thaliana* Col-0) and the  
156 primers (5'-TGGATCCACCGTGTGAGTTGGTAGCG-3' and 5'-  
157 AGGCGCGCCTGAAATTTGAAAAGAAGATCTAAG-3') (Strayer *et al.*, 2000). The  
158 1.4-kb DNA fragment was cloned into pENTR 5'-TOPO (Invitrogen) with an additional  
159 multi-cloning site. Using the LR reaction, the *AtCCR2* promoter in this plasmid was  
160 integrated into pUC18-*intron-LUC+*, in which the *aatR4-attL1* sequence was followed  
161 by the *intron-LUC+* and *Nos* terminator (Muranaka *et al.*, 2015).

162

### 163 Particle bombardment experiment and bioluminescence monitoring

164 Reporter constructs were introduced into the frond cells by particle  
165 bombardment, as described previously with minor modifications (Muranaka *et al.*, 2015).  
166 Briefly, 0.48 mg of gold particles (1.0- $\mu\text{m}$  diameter; Bio-Rad) were coated with 2  $\mu\text{g}$  of  
167 plasmid DNA and introduced into plants laid on a 35-mm polystyrene dish using a helium  
168 gun device (PDS-1000/He, Bio-Rad) according to the manufacturer's instructions  
169 (vacuum, 27 mmHg; helium pressure, 450 psi). After particle bombardment, the 35-mm  
170 dish was filled with 4 ml of modified NF medium containing D-luciferin (0.1 mM  
171 potassium salt, Wako) and set in a bioluminescence monitoring system in an incubator  
172 (KCLP-1000I-CT, NK system). Bioluminescence monitoring was performed as described  
173 previously (Muranaka *et al.*, 2015). The light intensity in the incubator was approximately  
174  $30 \mu\text{mol m}^{-2} \text{s}^{-1}$  and the temperature was maintained at  $20 \pm 1 \text{ }^\circ\text{C}$ ,  $25 \pm 1 \text{ }^\circ\text{C}$ , and  $30 \pm$   
175  $1 \text{ }^\circ\text{C}$ , respectively.

176

### 177 Estimation of period lengths

178 A time-series analysis was performed using R 3.4.1 (<http://www.R-project.org/>).



179 The period lengths under constant conditions were estimated by the fast Fourier transform  
180 non-linear least squares method, using 72-h of data (RAE < 0.2) obtained 24 h after  
181 changing from light/dark to constant light or constant dark (Muranaka & Oyama, 2016).

182

## 183 Results

### 184 Phylogenetic and geographic relationships of 15 species of Lemnaceae

185 We used duckweed species mainly from germplasm collections (see Materials  
186 and Methods), selecting seven out of ten *Wolffiella* species and eight out of 12 *Lemna*  
187 species (Fig. 1; Fig. S1, S2) (Tippery *et al.*, 2015). Phylogenetic studies have shown that  
188 *Wolffia* and *Wolffiella* are the most derived genera, and *Spirodela* is the most ancestral  
189 genus (Les *et al.*, 2002; Tippery *et al.*, 2015). In the case of *Wolffiella*, *W. hyalina* and *W.*  
190 *repanda* were phylogenetically close. In the case of *Lemna*, *L. valdiviana*, and *L. minuta*  
191 were phylogenetically close. We selected *Wolffiella* species, which are distributed in  
192 tropical, arid, and temperate areas, and *Lemna* species, which are distributed in tropical,  
193 temperate, and subarctic areas (Table 1). Of the strains we examined, *L. minor* 5512 was  
194 collected from the coldest area, and *W. caudata* 9139, *W. neotropica* 7279, and *L.*  
195 *valdiviana* 9475 were collected from hot areas; *W. welwitschii* 7644, *W. hyalina* 9525, and  
196 *W. repanda* 9122 were collected from hot and semi-arid areas. Specifically, *W. caudata*  
197 9139 and *L. valdiviana* 9475 were collected from the same area of Brazil; and *W. lingulata*  
198 7547 and *L. turionifera* 6619 were collected from the same area of the USA.

199

200 Stability of the circadian rhythms of *Wolffiella* species under constant  
201 conditions at different temperatures

202 Duckweed plants that were cultured under constant light conditions at 25 °C (a

203 standard temperature for duckweed culture) were used for the gene introduction  
204 experiments. The *AtCCA1::LUC+* reporter was introduced into the plants by particle  
205 bombardment (Muranaka *et al.*, 2013). The plants were then placed into an automatic  
206 monitoring system set in a growth chamber at 20, 25, or 30 °C. During the monitoring  
207 period, these plants were entrained to 12 h dark/ 12 h light cycles and then released into  
208 constant light or constant dark conditions (Fig. 2a). We monitored the reporter activities  
209 of *AtCCA1::LUC+* in the seven strains of *Wolffiella* (Fig. 2). At 25 °C, every species  
210 showed rhythmicity under both constant light and constant dark conditions (Fig. 2b–h).  
211 At 30 °C, except for *W. hyalina*, all *Wolffiella* species showed dampened bioluminescence  
212 rhythms or arrhythmic reporter activity under constant light conditions (Fig. 2b–h). Here,  
213 dampened rhythms indicate bioluminescence traces whose amplitude decreases more  
214 rapidly than the degree of alteration in luminescence level. These bioluminescence traces  
215 without any clear peaks (excluding the peak around light-on) in the first 48 h under  
216 constant conditions are defined as arrhythmic reporter activity (Table S1). At 30 °C,  
217 arrhythmic reporter activity or dampened rhythms in these *Wolffiella* species were also  
218 observed in the bioluminescence monitoring experiments using the evening-expressed  
219 reporter *AtCCR2::LUC*, whereas the activity of this reporter showed rhythmicity at 20  
220 and 25 °C (Fig. S3). These results strongly suggest that the stability of circadian rhythms  
221 is lost or severely decreased at higher temperatures, irrespective of circadian reporters.

222         The plants of all *Wolffiella* species grew faster at 30 °C than at lower  
223 temperatures (Fig. S4). Although this higher temperature impaired circadian rhythmicity,  
224 it was suitable for the growth of *Wolffiella* species. Indeed, the daily maximum  
225 temperatures in the natural habitats of this genus exceed 28 °C for more than three months  
226 of the year (Landolt, 1986). In contrast, all the *Wolffiella* species showed rhythmicity at

227 30 °C under constant dark conditions, suggesting that the destabilization of circadian  
228 rhythms was dependent on light (Fig. 2i–o). In the entrainment 12-h light/12-h dark  
229 conditions, every species showed a clear diurnal rhythm at 30 °C (Fig. S5). At 20 °C, *W.*  
230 *neotropica*, *W. welwitschii*, *W. hyalina*, and *W. repanda* showed dampened rhythms under  
231 both constant light and constant dark conditions (Fig. 2e–h, l–o). *W. lingulata*, *W. oblinga*,  
232 and *W. caudata* showed circadian rhythms under constant light conditions, while they  
233 showed dampened rhythms under constant dark conditions (Fig. 2b–d, i–k). These results  
234 indicate that the stability of *Wolffiella* circadian rhythms is highly dependent on light and  
235 temperature, and the magnitude of their effects varies among species.

236

### 237 Stability of the circadian rhythms of *Lemna* species in constant conditions at 238 different temperatures

239 We monitored the reporter activity of *AtCCA1::LUC+* in the eight *Lemna* strains  
240 (Fig. 3). Every *Lemna* species showed bioluminescence rhythms, including dampened  
241 rhythms under both constant light and dark conditions at all temperatures. At 25 °C, only  
242 *L. turionifera* showed dampened rhythms when monitored under constant dark conditions.  
243 At 30 °C, *L. valdiviana* showed dampened rhythms under both constant light and dark  
244 conditions, and *L. minuta* showed dampened rhythms under constant light conditions (Fig.  
245 3g, h, o). At 20 °C, *L. disperma*, *L. gibba*, and *L. minuta* showed robust rhythms, and the  
246 remaining species showed dampened rhythms under constant light conditions (Fig. 3 a–  
247 h). In contrast, only *L. valdiviana* and *L. minuta* showed dampened rhythms under  
248 constant dark conditions (Fig. 3o, p). In summary, *Lemna* species showed a tendency to  
249 maintain robust rhythms at 25 °C or above, while *L. valdiviana* and *L. minuta* showed  
250 unstable circadian rhythms at low and high temperatures. The observed high stability in

251 the *Lemna* species under constant light at 30 °C contrasts with the low stability of the  
252 *Wolffiella* species.

253

## 254 Temperature compensation of period lengths in Lemnaceae

255 We analyzed the period lengths under constant light or dark conditions at the  
256 three experimental temperatures (Fig. 4a, b for *Wolffiella*; Fig. 5a, b for *Lemna*). The  
257 period lengths of the *Wolffiella* species were strongly affected by light and temperature  
258 conditions, showing a wide variation among species (Fig. 3a, b). At 25 °C, under constant  
259 light conditions, *W. caudata*, *W. hyalina*, and *W. repanda* showed extremely long periods  
260 (> 30 h), while *W. lingulata*, *W. oblonga*, *W. neotropica*, and *W. welwitschii* showed  
261 relatively short periods ( $\leq 24$  h) (Fig. 4a, green bars). Under constant dark conditions, the  
262 period lengths of *W. lingulata*, *W. oblonga*, *W. caudata*, *W. neotropica*, and *W. welwitschii*  
263 were close to 24 h, while those of *W. hyalina* and *W. repanda* were close to 30 h (Fig. 4b,  
264 green bars). At 20 °C, the period lengths varied greatly among species (ranging from 19  
265 to 37 h) under constant light conditions. Interestingly, the period lengths of all species  
266 were approximately 24 h under constant dark conditions (Fig. 4a, b, blue bars). At 30 °C,  
267 under constant light conditions, the period length of *W. hyalina* was estimated to be  
268 approximately 36 h and that of *W. oblonga* was approximately 24 h (Fig. 4a, red bars).  
269 Under constant dark conditions, the period lengths of *W. lingulata*, *W. oblonga*, *W.*  
270 *caudata*, *W. neotropica*, and *W. welwitschii* were approximately 24 h, while those of *W.*  
271 *hyalina* and *W. repanda* were longer than 30 h (Fig. 4b, red bars). *W. hyalina* and *W.*  
272 *repanda* showed longer period lengths than the other *Wolffiella* species under all  
273 conditions. This suggests that with respect to circadian properties, *W. hyalina* and *W.*  
274 *repanda* can be distinguished from other *Wolffiella* species.

275           The  $Q_{10}$  temperature coefficient is the change in the reaction rate with a  
276 temperature increase of 10 °C. The  $Q_{10}$  value of most biological reactions ranges between  
277 2 and 3, while that of circadian rhythms is close to 1. The  $Q_{10}$  values of the *Wolffiella*  
278 species under constant light conditions were between 0.40 and 1.59, while those under  
279 constant dark conditions were between 0.73 and 1.08 (Fig. 4c). The  $Q_{10}$  values of *W.*  
280 *oblonga*, *W. caudata* and *W. neotropica* were closer to 1 under constant dark conditions  
281 than under constant light conditions. This suggests that the temperature compensation of  
282 circadian rhythms in *Wolffiella* species is influenced by light conditions.

283           In the case of the *Lemna* species, the period lengths at 25 °C under constant light  
284 conditions were between 24 h and 28 h, and those in constant dark conditions were  
285 between 21 h and 30 h (Fig. 5a, b, green bars). In contrast to the *Wolffiella* species, the  
286 period lengths among the *Lemna* species varied more under constant dark conditions than  
287 under constant light conditions at 25 °C. At 20 °C, the period lengths were approximately  
288 24 h under both constant light and constant dark conditions (Fig. 5a, b, blue bars). At  
289 30 °C, *L. valdiviana* and *L. minuta* showed period lengths close to 30 h under constant  
290 light conditions (Fig. 5a, red bars); *L. gibba* also showed period lengths longer than 30 h  
291 under constant dark conditions; and the period lengths of the other species were  
292 approximately 24 h at 30 °C. The  $Q_{10}$  values of the *Lemna* species under constant light  
293 conditions ranged between 0.75 and 1.03, while those under constant dark conditions  
294 ranged between 0.84 and 1.01 (Fig. 5c). Such interspecific divergence indicates that the  
295 temperature compensation of circadian rhythms in *Lemna* is more robust than that of  
296 *Wolffiella*, especially under constant light conditions.

297

298   Phylogenetic and geographic comparison of circadian properties

299 Phylogenetically close species of *Wolffiella* and *Lemna* showed similar circadian  
300 properties (Fig. 1; Table S1). In the case of *Wolffiella*, the circadian properties of *W.*  
301 *hyalina* and *W. repanda* were similar in terms of period length and stability. As previously  
302 noted, these two species can be distinguished from other species of *Wolffiella* based on  
303 their circadian properties, and are phylogenetically close. In the case of *Lemna*, the  
304 circadian properties of *L. valdiviana* and *L. minuta* were similar in terms of stability.  
305 These two species are phylogenetically close. These results suggest that differences in  
306 circadian properties increase with speciation. In particular, the stability of circadian  
307 rhythms likely decreased when the *W. hyalina* and *W. repanda* group became  
308 distinguished from other *Wolffiella* species.

309 A geographical factor in the circadian properties can also be broadly identified  
310 in *Lemna*; species inhabiting colder climates tend to have more stable circadian rhythms  
311 (Table S2). For example, species inhabiting temperate and subarctic areas showed more  
312 stable rhythms under high- and low-temperature conditions than those inhabiting the  
313 tropics, i.e., *L. valdiviana*. Interestingly, *L. minuta*, which is closest in the phylogenetic  
314 tree to *L. valdiviana*, and inhabits temperate areas, also showed unstable rhythms but with  
315 a higher level of circadian stability. However, no such tendency was observed in the  
316 *Wolffiella* species. These results suggest that interspecific divergence in circadian  
317 properties is strongly related to phylogenetic factors rather than geographical factors.

318

## 319 Discussion

320 Using a bioluminescence monitoring system, we measured the circadian rhythms  
321 of 15 species of *Lemna* and *Wolffiella* under the same strictly controlled conditions. Under  
322 various experimental temperatures, we revealed interspecific divergence in period length

323 and stability. *Wolffiella* species tended to show unstable/deviated circadian rhythms,  
324 whereas *Lemna* species tended to show stable rhythms. Thus, the circadian properties of  
325 the studied species were largely reflected by their phylogenetic position. *Wolffiella*  
326 species are morphologically distinct from those of the *Lemna* genus and inhabit relatively  
327 low latitude areas, suggesting that differences in circadian properties may further be  
328 related to morphological divergence and geographical adaptation.

329

### 330 Decrease in circadian rhythmicity in *Wolffiella* species

331 We found highly diverse circadian properties within the *Wolffiella* genus, with  
332 most species showing low robustness at high temperature under constant light conditions  
333 (Fig. 2). This suggests that mechanisms to maintain circadian rhythmicity under various  
334 light/temperature conditions are diversified in *Wolffiella*. Many *Wolffiella* species inhabit  
335 low-latitude areas where temperature and day-length variations are small throughout the  
336 year (Hut *et al.*, 2013). Thus, circadian clocks with high stability may not contribute to  
337 the fitness of *Wolffiella* plants, which inhabit relatively constant environments. This may  
338 be related to aquatic habitats that commonly experience smaller daily fluctuations than  
339 terrestrial environments. Because the circadian rhythms of all *Wolffiella* species were  
340 synchronized to the light/dark cycle, even at high temperature (Fig. S5), their unstable  
341 circadian clocks must be entrained to day/night cycles in the natural environments.

342 In addition to the lower stability of circadian rhythms, a wide interspecific  
343 divergence in period length was observed in *Wolffiella*. Specifically, under constant light  
344 conditions at 25°C, period length varied by approximately 19 h in *Wolffiella* compared to  
345 4 h in *Lemna*. The observed variation between the *Lemna* species is comparable to that  
346 reported for other plants; *Arabidopsis thaliana* shows intraspecific variations (natural

347 variation) in period lengths of approximately 7.5 h among a large number of accessions  
348 (Michael *et al.*, 2003; Edwards *et al.*, 2005; Rees *et al.*, 2021). *Kalanchoe* also shows  
349 interspecific variation in period length of approximately 6 h among six species (Malpas  
350 & Jones, 2016). The comparatively large interspecific variation of *Wolffiella* results from  
351 the existence of species with extremely long periods, i.e., *W. hyalina* and *W. repanda*, of  
352 more than 30 h under constant light conditions (Fig. 4a, b). A very long period has also  
353 been reported for *W. hyalina* strain 8640, suggesting that the strain 9525 used in our study  
354 has representative circadian properties for this species (Isoda & Oyama, 2018).  
355 Interestingly, period length was overcompensated with increasing temperature,  
356 suggesting that mechanisms controlling period lengthening may be linked to exaggerated  
357 temperature compensation (Fig. 4).

358 The circadian properties of *Wolffiella* appear to mimic *Arabidopsis* clock gene  
359 mutants. Similar to *W. hyalina*, the *prr7prr9* and *cca1lhy* double mutants show much  
360 longer periods at higher temperatures under constant light conditions; these double  
361 mutants show exaggerated temperature compensation of period length (Salomé *et al.*,  
362 2010; Shalit-Kaneh *et al.*, 2018). With respect to the stability of circadian rhythms, the *gi*  
363 single mutant, *cca1lhy* double mutant, and *cca1lhyrve4rve6rve8* quint mutant show lower  
364 stability at higher and lower temperatures than at moderate temperatures (Gould *et al.*,  
365 2006; Shalit-Kaneh *et al.*, 2018). The similarities in circadian properties between  
366 *Wolffiella* species and *Arabidopsis* loss-of-function mutants suggest that some of these  
367 clock genes may be malfunctioning in *Wolffiella* plants. Interestingly, *W. australiana* in  
368 the genus *Wolffia*, which is the closest relative to the *Wolffiella* genus, lacks several clock  
369 genes in its genome including some of PRRs (Michael *et al.*, 2021). Thus, the lack of  
370 these clock-related genes may be involved in the instability of circadian rhythms and



371 period overcompensation in *Wolffiella* plants.

372

### 373 Relationship between circadian properties and geographical factors

374 *Lemna* plants showed more stable circadian rhythms than *Wolffiella* plants, with the  
375 former genus widely distributed in low- to high-latitude areas (Landolt, 1986). This wider  
376 distribution may be related to circadian rhythms with higher stability. The *Lemna* species  
377 found in warmer climates tended to show more unstable rhythms (Table S2); *L. valdiviana*  
378 inhabits tropical areas and showed the lowest stability among the *Lemna* species we  
379 observed; and *L. minuta*, the most closely related species to *L. valdiviana*, mainly inhabits  
380 higher latitudes, and its circadian rhythms were more stable than those of *L. valdiviana*.  
381 Together with the low stability of *Wolffiella* plants inhabiting low latitudes, the  
382 destabilization of circadian rhythms may be related to tropical and low-latitude  
383 environments. Such a relationship has also been discussed in marine cyanobacteria.  
384 *Prochlorococcus* inhabits low-latitude oceans while its closest marine relative  
385 *Synechococcus* inhabits a wide range of oceans up to high latitudes (Flombaum *et al.*,  
386 2013). Interestingly, *Synechococcus* maintains a basic set of clock genes while  
387 *Prochlorococcus* lacks an essential clock gene (*kaiA*) for circadian rhythmicity (Johnson  
388 & Egli, 2014). These findings suggest that the stability of circadian rhythms is important  
389 for inhabiting wide areas of the Earth. In addition to destabilization, the lengthening of  
390 plant circadian periods may be related to low-latitude environments. Indeed, very long  
391 period lengths (leaf movement) are observed in leguminous plants in tropical areas as  
392 well as in *W. hyalina* and *W. repanda* (Mayer, 1966). Thus, interspecific divergence in  
393 plant circadian rhythm stability appears to be related to species' natural distributions. It  
394 should be noted that various species of *Lemna* and *Wolffiella* have overlapping

395 distributions (Landolt, 1986). It would be interesting to determine whether differences in  
396 the stability of plant circadian rhythms are related to survival under a range of  
397 environmental conditions, such as in high-latitude areas.

398

399 Morphological differences between *Lemna* and *Wolffiella* and their relation  
400 to the circadian properties

401         In *Arabidopsis*, it has been reported that different tissues have different circadian  
402 properties (Endo, 2016). In particular, the circadian clock of vascular tissue is robust and  
403 affects the circadian clocks of other tissues (Endo *et al.*, 2014). In duckweed, *Lemna* and  
404 *Wolffiella* are morphologically distinct. Figure 6 shows the phylogenetic relationships  
405 between species from these two genera along with their morphological and circadian  
406 characteristics. Compared to *Lemna*, *Wolffiella* species have lost not only roots but also  
407 frond nerves, and they lack vascular tissue (Les *et al.*, 1997). The observed unstable  
408 rhythms of *Wolffiella* plants under constant light conditions at high temperature appear to  
409 be linked to the degeneration of vascular tissue in this genus. Within the genus, *W. hyalina*  
410 and *W. repanda* have filament tracheids in the stamen while these are lacking in other  
411 *Wolffiella* species (Les *et al.*, 1997). Interestingly, these two species exhibited relatively  
412 stable rhythms under constant conditions. Furthermore, *L. minuta* and *L. valdiviana*,  
413 which showed dampened rhythms under constant light conditions at high temperature,  
414 have also lost filament tracheids. Notably, no flowering was observed during the  
415 experiment period, which suggests that the loss of ability to differentiate filament tracheid  
416 may be linked to the destabilization of circadian rhythms in duckweed; genes involved in  
417 tracheid differentiation may influence the stability of circadian rhythms.

418

419 Overall, our study reveals that interspecific divergence in the circadian properties  
420 of duckweed species primarily reflects phylogenetic relationships, and is likely to be  
421 related to geographical factors such as climate. Its evolutionary process will be  
422 approached through the comparative analysis of Lemnoideae and Wolffioideae genomes.  
423 It may be the case that genes controlling nerves or filament tracheids are also responsible  
424 for circadian stability. Furthermore, the fact that duckweed plants at low latitudes tended  
425 to show dampened/unstable rhythms at high temperatures raises the possibility that the  
426 degeneration of circadian rhythms generally occurs in plants in low-latitude areas.  
427 However, as yet, there are relatively few studies on the circadian rhythms of plants in the  
428 tropics (Mayer, 1966; Malpas & Jones, 2016). Further studies are, therefore, required to  
429 examine the circadian rhythms of plants in the tropics to contribute to our understanding  
430 of circadian adaptations in more stable environments.

431

## 432 Acknowledgments

433 We thank Dr. Masaaki Morikawa, Dr. Walter Lämmler, and Dr. Eric Lam for  
434 providing us with duckweed plants. This work was supported in part by the Japan Society  
435 for the Promotion of Science KAKENHI (Grant numbers 19H03245, 21K18239), the  
436 Japan Science and Technology Agency (JST) ALCA and SATREPS to TO, and  
437 KAKENHI (Grant number 20K06342) to SI, and KAKENHI (Grant number JP21J15792)  
438 to MI.

439

## 440 Author contributions

441 MI and TO planned and designed the research. MI performed experiments. MI  
442 analyzed the data. SI created a reporter construct. MI and TO wrote the manuscript.

443

444 References

- 445 **Acosta K, Appenroth KJ, Borisjuk L, Edelman M, Heinig U, Jansen MA, Oyama T,**  
446 **Pasaribu B, Schubert I, Sorrels S et al. 2021.** Return of the Lemnaceae: duckweed as a  
447 model plant system in the genomics and postgenomics era. *The Plant Cell* **33**: 3207–3234.
- 448 **Bog M, Sree KS, Fuchs J, Hoang PTN, Schubert I, Kuever J, Rabenstein A, Paolacci**  
449 **S, Jansen MAK, Appenroth K-J. 2020.** A taxonomic revision of *Lemna* sect. *Uninerves*  
450 (Lemnaceae). *TAXON* **69**: 56–66.
- 451 **Edwards KD, Lynn JR, Gyula P, Nagy F, Millar AJ. 2005.** Natural allelic variation in  
452 the temperature-compensation mechanisms of the *Arabidopsis thaliana* circadian clock.  
453 *Genetics* **170**: 387–400.
- 454 **Endo M. 2016.** Tissue-specific circadian clocks in plants. *Current Opinion in Plant*  
455 *Biology* **29**: 44–49.
- 456 **Endo M, Shimizu H, Nohales MA, Araki T, Kay SA. 2014.** Tissue-specific clocks in  
457 *Arabidopsis* show asymmetric coupling. *Nature* **515**: 419–422.
- 458 **Ferrari C, Proost S, Janowski M, Becker J, Nikoloski Z, Bhattacharya D, Price D,**  
459 **Tohge T, Bar-Even A, Fernie A et al. 2019.** Kingdom-wide comparison reveals the  
460 evolution of diurnal gene expression in Archaeplastida. *Nature communications* **10**: 1–13.
- 461 **Flombaum P, Gallegos JL, Gordillo RA, Rincón J, Zabala LL, Jiao N, Karl DM, Li**  
462 **WKW, Lomas MW, Veneziano D, et al. 2013.** Present and future global distributions of  
463 the marine Cyanobacteria *Prochlorococcus* and *Synechococcus*. *Proceedings of the*  
464 *National Academy of Sciences, USA* **110**: 9824–9829.
- 465 **Gould PD, Locke JCW, Larue C, Southern MM, Davis SJ, Hanano S, Moyle R,**  
466 **Milich R, Putterill J, Millar AJ, et al. 2006.** The Molecular Basis of Temperature

- 467 Compensation in the *Arabidopsis* Circadian Clock. *The Plant Cell* **18**: 1177–1187.
- 468 **Hillman WS. 1970.** Carbon dioxide output as an index of circadian timing in *Lemna*  
469 photoperiodism. *Plant Physiology* **45**: 273–279.
- 470 **Hsu PY, Harmer SL. 2014.** Wheels within wheels: the plant circadian system. *Trends in*  
471 *plant science* **19**: 240–249.
- 472 **Hut RA, Paolucci S, Dor R, Kyriacou CP, Daan S. 2013.** Latitudinal clines: an  
473 evolutionary view on biological rhythms. *Proceedings of the Royal Society B: Biological*  
474 *Sciences* **280**: 20130433.
- 475 **Inoue K, Araki T, Endo M. 2018.** Circadian clock during plant development. *Journal of*  
476 *Plant Research* **131**: 59–66.
- 477 **Isoda M, Oyama T. 2018.** Use of a duckweed species, *Wolffiella hyalina*, for whole-  
478 plant observation of physiological behavior at the single-cell level. *Plant Biotechnology*  
479 **35**: 387–391.
- 480 **Johnson CH, Egli M. 2014.** Metabolic Compensation and Circadian Resilience in  
481 Prokaryotic Cyanobacteria. *Annual Review of Biochemistry* **83**: 221–247.
- 482 **Kondo T, Tsudzuki T. 1978.** Rhythm in potassium uptake by a duckweed, *Lemna gibba*  
483 *G3*. *Plant and Cell Physiology* **19**: 1465–1473.
- 484 **Landolt E. 1986.** Biosystematic investigations in the family of duckweeds (*Lemnaceae*).  
485 II: The family of *Lemnaceae*: a monographic study. 1. *Veröffentlichungen des*  
486 *Geobotanischen Institutes der ETH, Stiftung Rübél, Zürich*.
- 487 **Les DH, Crawford DJ, Landolt E, Gabel JD, Kimball RT. 2002.** Phylogeny and  
488 systematics of Lemnaceae, the duckweed family. *Systematic Botany* **27**: 221–240.
- 489 **Les DH, Landolt E, Crawford DJ. 1997.** Systematics of the *Lemnaceae* (duckweeds):  
490 Inferences from micromolecular and morphological data. *Plant Systematics and*

- 491 *Evolution* **204**: 161–177.
- 492 **Linde A-M, Eklund DM, Kubota A, Pederson ERA, Holm K, Gyllenstrand N,**  
493 **Nishihama R, Cronberg N, Muranaka T, Oyama T, et al. 2017.** Early evolution of the  
494 land plant circadian clock. *New Phytologist* **216**: 576–590.
- 495 **Malpas KR, Jones MA. 2016.** Natural variation of circadian rhythms in *Kalanchoe*  
496 species. *Haseltonia* **2016**: 35–42.
- 497 **Mayer W. 1966.** Peculiarities of circadian rhythms in plants from different geographical  
498 latitudes. *Planta* **70**: 237–256.
- 499 **Michael TP, Ernst E, Hartwick N, Chu P, Bryant D, Gilbert S, Ortleb S, Baggs EL,**  
500 **Sree KS, Appenroth KJ et al. 2021.** Genome and time-of-day transcriptome of *Wolffia*  
501 *australiana* link morphological minimization with gene loss and less growth control.  
502 *Genome Research* **31**: 225–238.
- 503 **Michael TP, Salome PA, Hannah JY, Spencer TR, Sharp EL, McPeck MA, Alonso**  
504 **JM, Ecker JR, McClung CR. 2003.** Enhanced fitness conferred by naturally occurring  
505 variation in the circadian clock. *Science* **302**: 1049–1053.
- 506 **Miwa K, Serikawa M, Suzuki S, Kondo T, Oyama T. 2006.** Conserved expression  
507 profiles of circadian clock-related genes in two *Lemna* species showing long-day and  
508 short-day photoperiodic flowering responses. *Plant and Cell Physiology* **47**: 601–612.
- 509 **Miyata H, Yamamoto Y. 1969.** Rhythms in respiratory metabolism of *Lemna gibba* G3  
510 under continuous illumination. *Plant and Cell Physiology* **10**: 875–889.
- 511 **Müller NA, Wijnen CL, Srinivasan A, Ryngajillo M, Ofner I, Lin T, Ranjan A, West**  
512 **D, Maloof JN, Sinha NR et al. 2016.** Domestication selected for deceleration of the  
513 circadian clock in cultivated tomato. *Nature Genetics* **48**: 89–93.
- 514 **Muranaka T, Kubota S, Oyama T. 2013.** A single-cell bioluminescence imaging system

515 for monitoring cellular gene expression in a plant body. *Plant and Cell Physiology* **54**:  
516 2085–2093.

517 **Muranaka T, Okada M, Yomo J, Kubota S, Oyama T. 2015.** Characterisation of  
518 circadian rhythms of various duckweeds. *Plant Biology* **17**: 66–74.

519 **Muranaka T, Oyama T. 2016.** Heterogeneity of cellular circadian clocks in intact plants  
520 and its correction under light-dark cycles. *Science Advances* **2**: e1600500.

521 **Nohales MA, Kay SA. 2016.** Molecular mechanisms at the core of the plant circadian  
522 oscillator. *Nature Structural & Molecular Biology* **23**: 1061–1069.

523 **Pokhilko A, Fernández AP, Edwards KD, Southern MM, Halliday KJ, Millar AJ.**  
524 **2012.** The clock gene circuit in *Arabidopsis* includes a repressilator with additional  
525 feedback loops. *Molecular Systems Biology* **8**: 574.

526 **Rees H, Joynson R, Brown JK, Hall A. 2021.** Naturally occurring circadian rhythm  
527 variation associated with clock gene loci in Swedish *Arabidopsis* accessions. *Plant, Cell*  
528 *& Environment* **44**: 807–820.

529 **Salomé PA, Weigel D, McClung CR. 2010.** The role of the *Arabidopsis* morning loop  
530 components CCA1, LHY, PRR7, and PRR9 in temperature compensation. *The Plant Cell*  
531 **22**: 3650–3661.

532 **Sanchez SE, Rugnone ML, Kay SA. 2020.** Light Perception: A Matter of Time.  
533 *Molecular Plant* **13**: 363–385.

534 **Serikawa M, Miwa K, Kondo T, Oyama T. 2008.** Functional conservation of clock-  
535 related genes in flowering plants: overexpression and RNA interference analyses of the  
536 circadian rhythm in the monocotyledon *Lemna gibba*. *Plant physiology* **146**: 1952–1963.

537 **Shalit-Kaneh A, Kumimoto RW, Filkov V, Harmer SL. 2018.** Multiple feedback loops  
538 of the *Arabidopsis* circadian clock provide rhythmic robustness across environmental

- 539 conditions. *Proceedings of the National Academy of Sciences* **115**: 7147–7152.
- 540 **Song YH, Ito S, Imaizumi T. 2010.** Similarities in the circadian clock and  
541 photoperiodism in plants. *Current Opinion in Plant Biology* **13**: 594–603.
- 542 **Sree KS, Bog M, Appenroth KJ. 2016.** Taxonomy of duckweeds (Lemnaceae), potential  
543 new crop plants. *Emirates Journal of Food and Agriculture*: 291–302.
- 544 **Strayer C, Oyama T, Schultz TF, Raman R, Somers DE, Más P, Panda S, Kreps JA,**  
545 **Kay SA. 2000.** Cloning of the *Arabidopsis* clock gene TOC1, an autoregulatory response  
546 regulator homolog. *Science* **289**: 768–771.
- 547 **Tippary NP, Les DH, Crawford DJ. 2015.** Evaluation of phylogenetic relationships in  
548 Lemnaceae using nuclear ribosomal data. *Plant Biology* **17**: 50–58.
- 549 **Watanabe E, Isoda M, Muranaka T, Ito S, Oyama T. 2021.** Detection of uncoupled  
550 circadian rhythms in individual cells of *Lemna minor* using a dual-color bioluminescence  
551 monitoring system. *Plant and Cell Physiology* **62**: 815–826.



Fig. 1

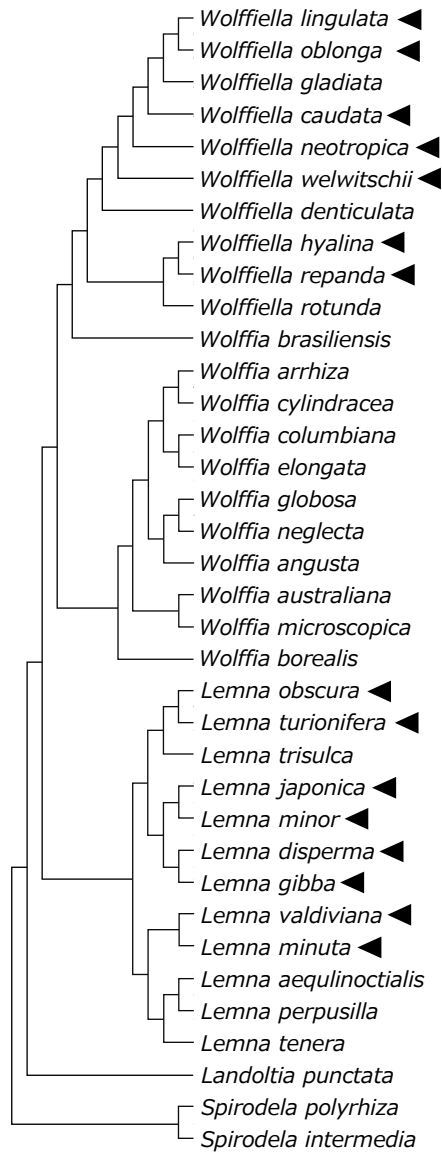

**Fig. 1** Phylogenetic relationship of the family Lemnaceae. A phylogenetic tree with every species of duckweed (Sree *et al.*, 2016, Bog *et al.*, 2020) based on Les *et al.* (2002) and Tippery *et al.* (2015). Arrowheads indicate the species used in this study.

Fig. 2

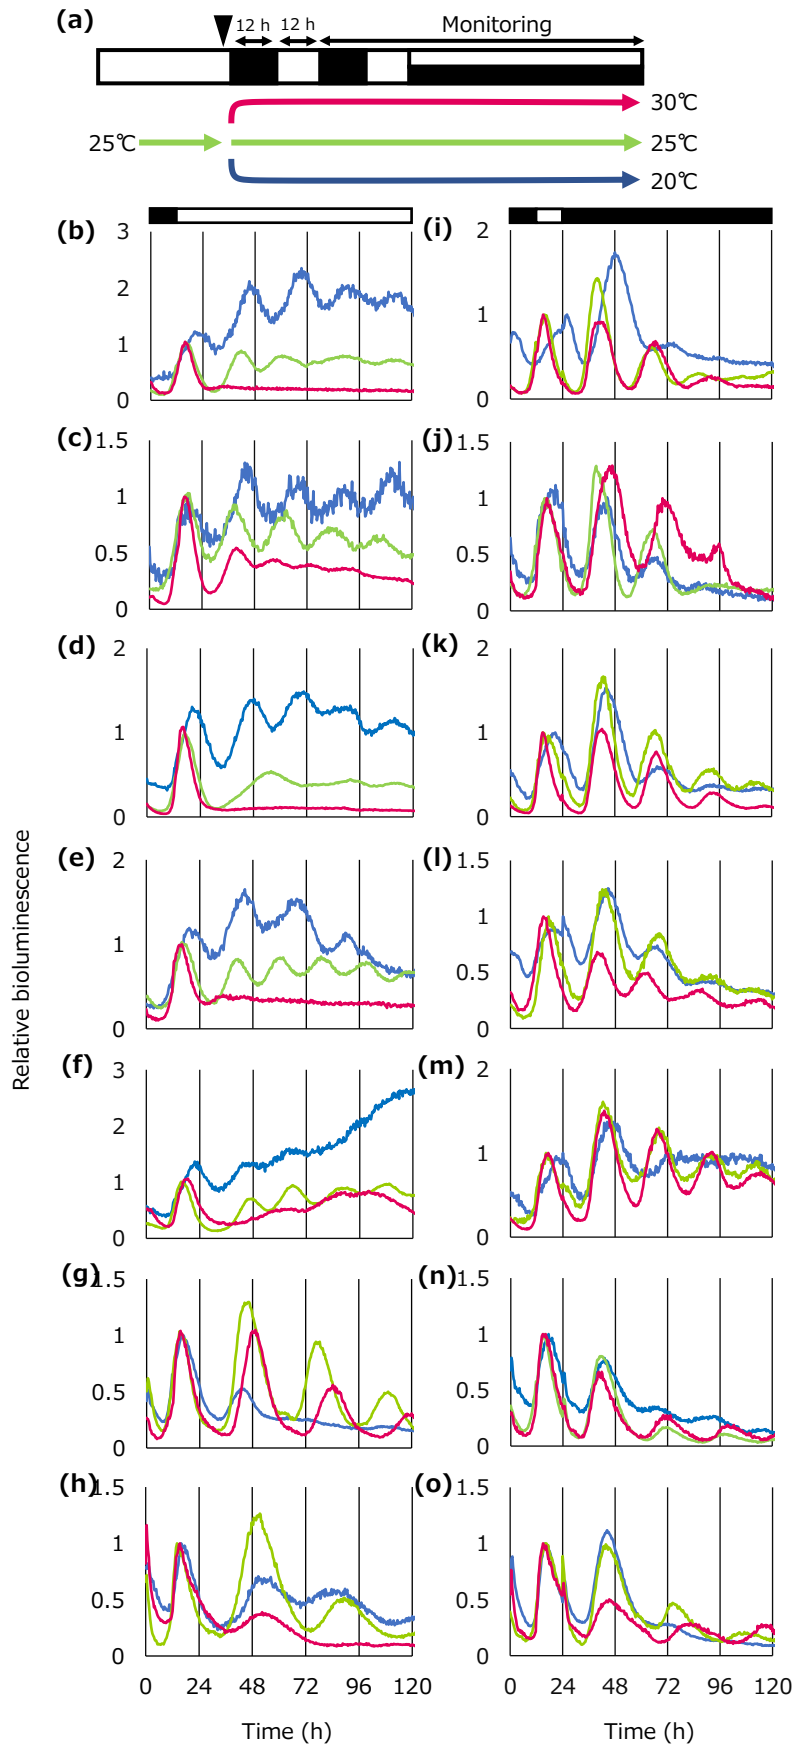

**Fig. 2** Bioluminescence of *AtCCA1::LUC+* under constant light (b–h) and constant dark (i–o) conditions at various temperatures. (a) Scheme of experimental methods for bioluminescence monitoring. Plants cultured in NF medium under constant light conditions were subjected to gene transfection and then entrained to two 12-h dark/12-h light cycles and released into constant light or constant dark conditions. White and black bars indicate light and dark periods, respectively. *AtCCA1::LUC+* was introduced into *W. lingulata* (b, i), *W. oblonga* (c, j), *W. caudata* (d, k), *W. neotropica* (e, l), *W. welwitschii* (f, m), *W. hyalina* (g, n), and *W. repanda* (h, o). The red, green, and blue colors indicate 30, 25, and 20 ° C, respectively. The representative time-series data of four replicates in two independent experiments is shown for each species/condition. The data are presented as relative values with the highest value between 12 h and 36 h set to 1.

Fig. 3

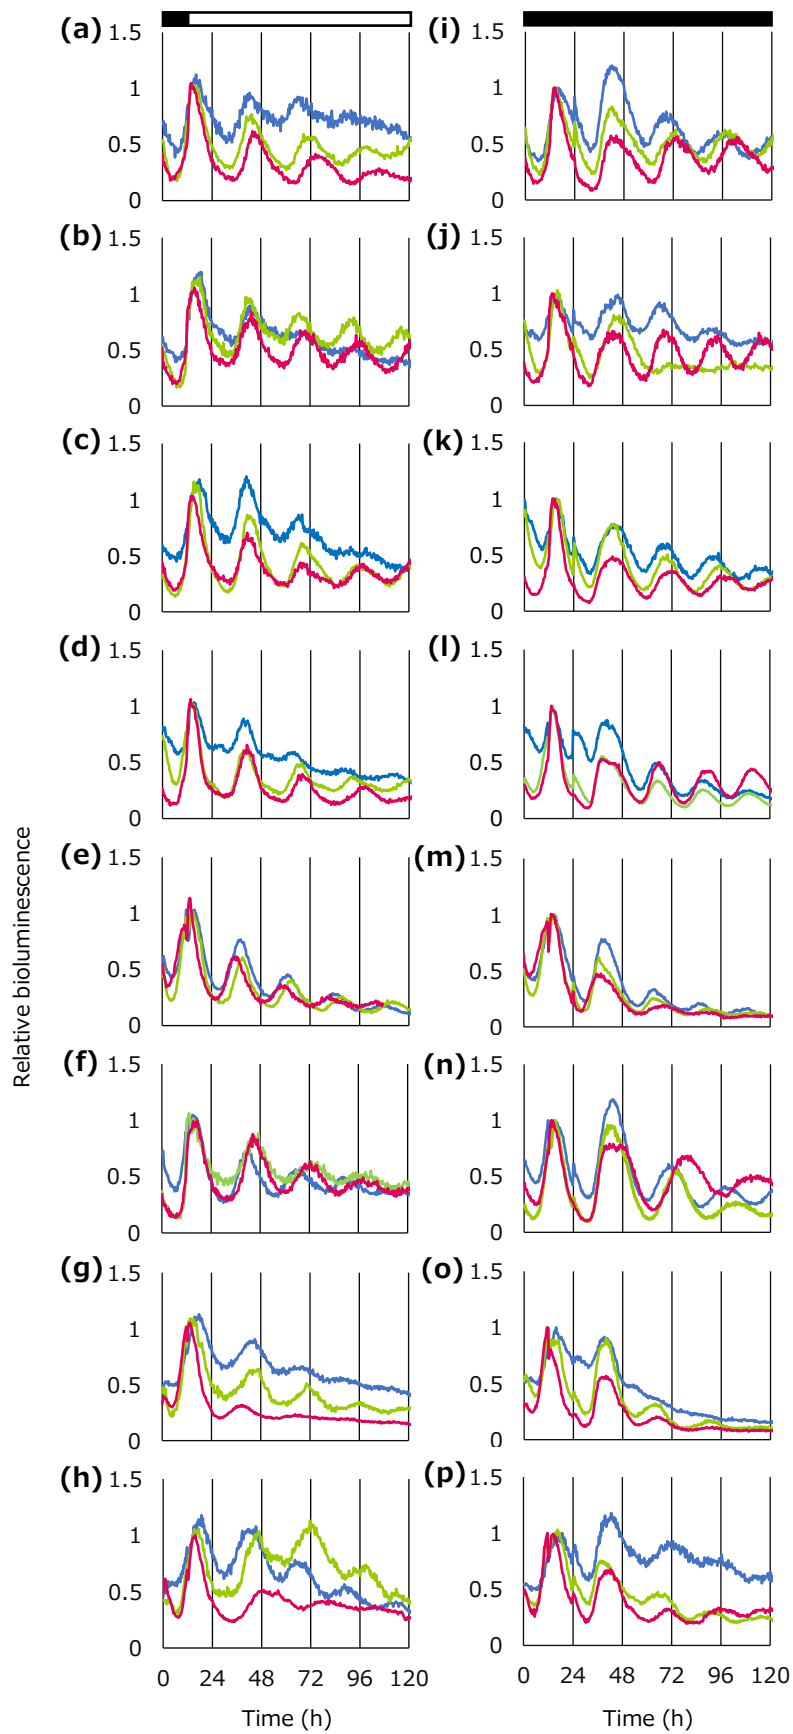

**Fig. 3** Bioluminescence of *AtCCA1::LUC+* under constant light (a–h) and constant dark (i–p) conditions at various temperatures. *AtCCA1::LUC+* was introduced into (a, i) *L. obscura*, (b, j) *L. turionifera*, (c, k) *L. japonica*, (d, l) *L. minor*, (e, m) *L. disperma*, (f, n) *L. giabba*, (g, o) *L. valdiviana*, and (h, p) *L. minuta*. The red, green, and blue colors indicate 30, 25, and 20 ° C, respectively. Plants cultured in NF medium under constant light conditions were subjected to gene transfection and then entrained to two 12-h dark/12-h light cycles and released into constant light or constant dark conditions; white and black bars indicate light and dark periods, respectively. The representative time-series data of four replicates in two independent experiments are shown for each species/condition. The data are presented as relative values with the highest value between 12 h and 36 h set to 1.

Fig. 4

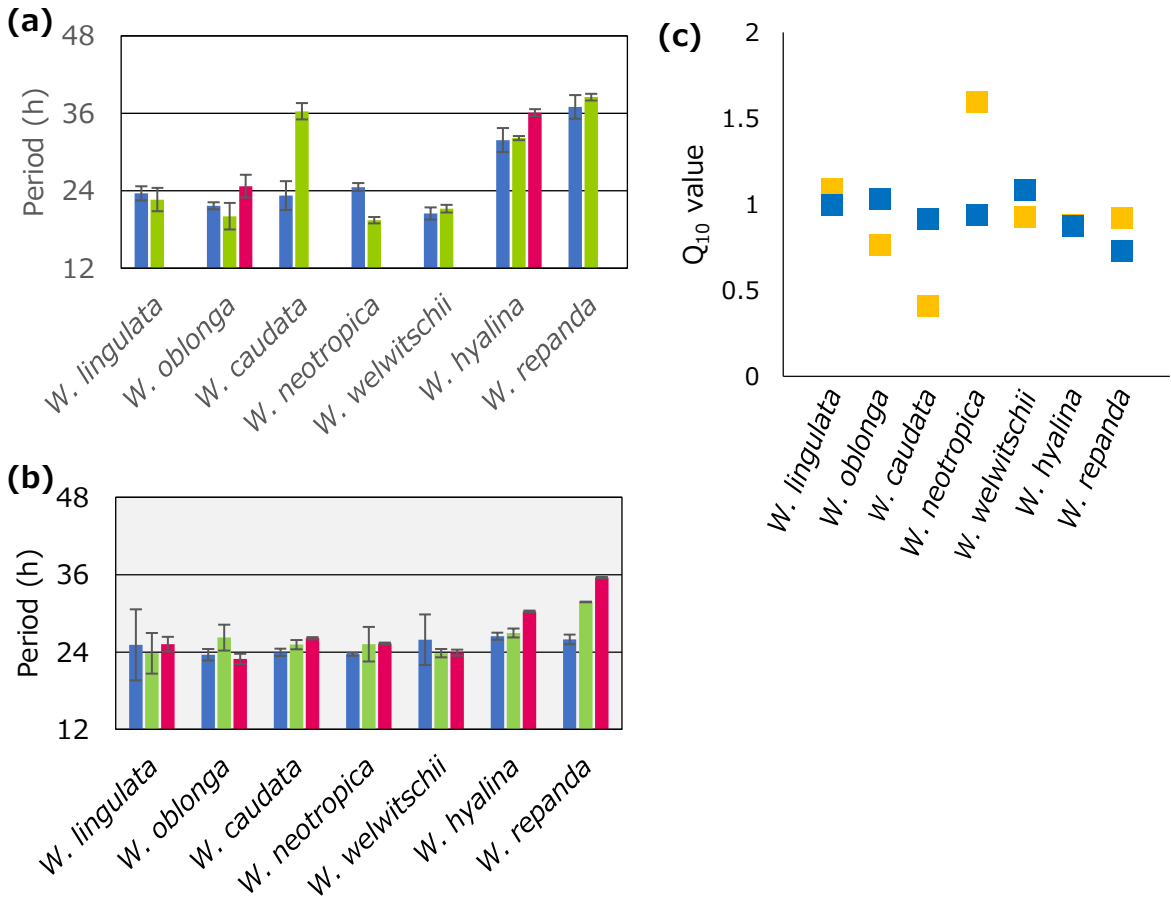

**Fig. 4** Interspecific divergence of period lengths among *Wolffiella* species. (a) Period lengths under constant light conditions. (b) Period lengths under constant dark conditions. Red, green, and blue colors indicate 30, 25, and 20 ° C, respectively. The data represent the mean  $\pm$  SD ( $n = 4$ ). (c)  $Q_{10}$  values of *Wolffiella* species under constant light and constant dark conditions. The yellow and blue squares indicate constant light and constant dark conditions, respectively.

Fig. 5

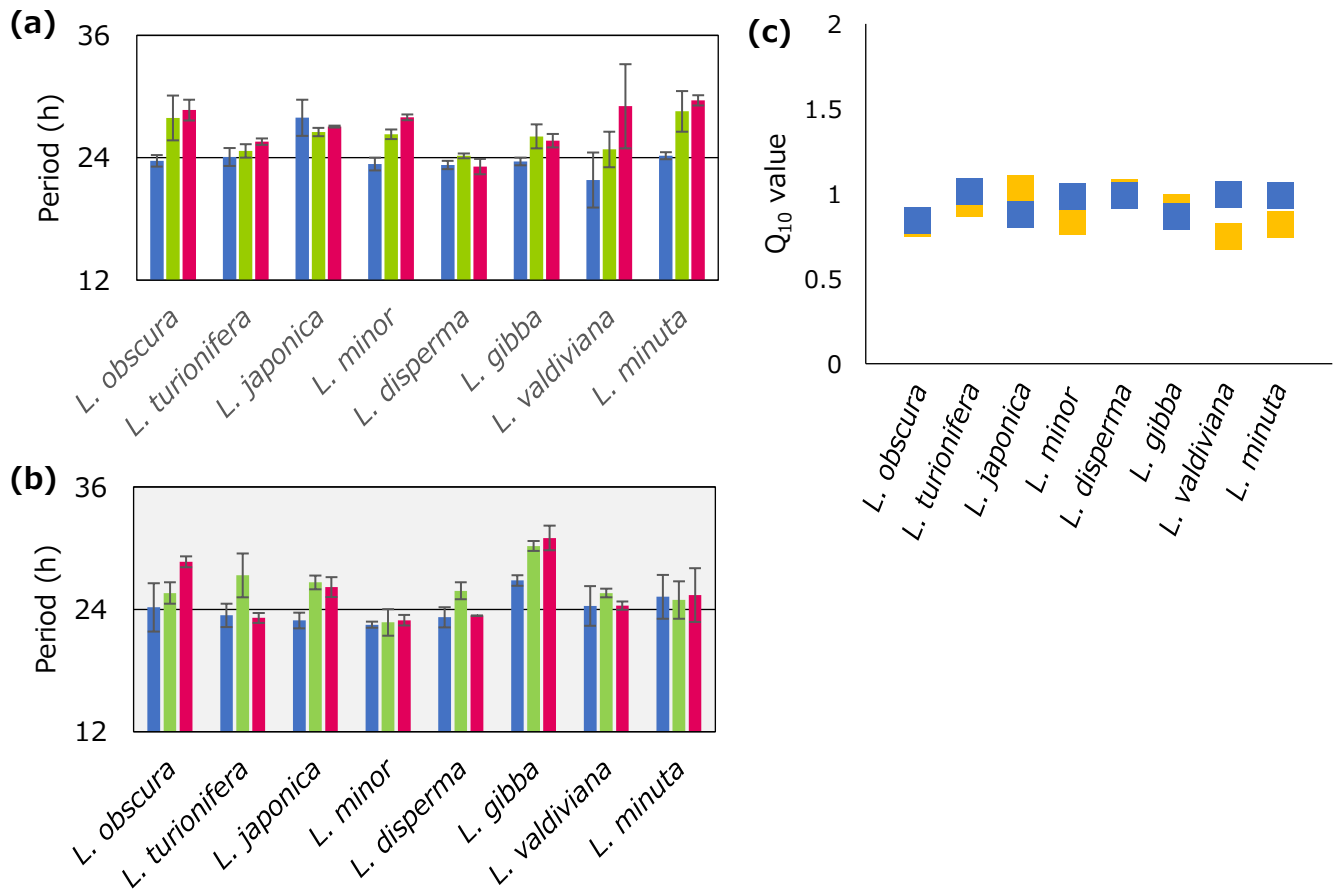

**Fig. 5** Interspecific divergence of period lengths among *Lemna* species. (a) Period lengths under constant light conditions. (b) Period lengths under constant dark conditions. Red, green, and blue bars indicate 30, 25, and 20 ° C, respectively. The data represent the mean  $\pm$  SD ( $n = 4$ ). (c)  $Q_{10}$  values of *Lemna* species under constant light and constant dark conditions. The yellow and blue squares indicate constant light and constant dark conditions, respectively.

Fig. 6

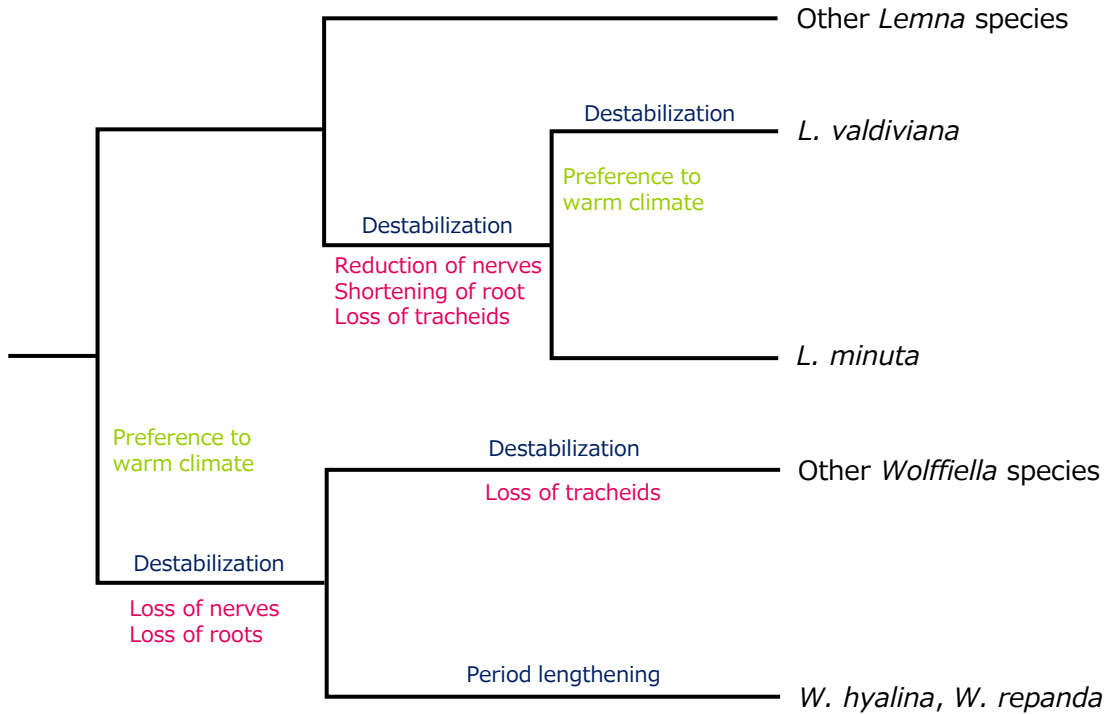

**Fig. 6** Schematic diagram representing an evolutionary scenario for the degeneration of circadian rhythms in duckweed. Evolutionary events of the circadian properties (blue), morphological features (red), and climate adaptation (green) are noted on a simplified phylogenetic tree.



**Table 1** Geographical location and Köppen climate classification on the species used in this study.

| Genus             | Species            | Strain | Continent/Region | Country        | State/City                                                         | Köppen Climate Classification |
|-------------------|--------------------|--------|------------------|----------------|--------------------------------------------------------------------|-------------------------------|
| <i>Wolffiella</i> | <i>lingulata</i>   | 7547   | North America    | USA            | California, San Luis Obispo Co., Oso Flaco Lake                    | Cs                            |
| <i>Wolffiella</i> | <i>oblonga</i>     | 7201   | South America    | Argentina      | Buenos Aires, Arroyo Burgueno                                      | Cfa                           |
| <i>Wolffiella</i> | <i>caudata</i>     | 9139   | South America    | Brazil         | Manaus                                                             | Am                            |
| <i>Wolffiella</i> | <i>neotropica</i>  | 7279   | South America    | Brazil         | Rio de Janeiro, Cabo Frio                                          | Aw                            |
| <i>Wolffiella</i> | <i>welwitschii</i> | 7644   | Africa           | Angola         | Benguela                                                           | BW                            |
| <i>Wolffiella</i> | <i>hyalina</i>     | 9525   | Asia             | India          | Hyderabad, Sanjeevaiah Park                                        | BS                            |
| <i>Wolffiella</i> | <i>repanda</i>     | 9122   | South America    | Zimbabwe       | Hurungwe Safari Area, 12 km SE of Chirundu                         | BS                            |
| <i>Lemna</i>      | <i>obscura</i>     | 8892   | North America    | USA            | Florida, Pinellas Co., Tarpon Springs                              | Cfa                           |
| <i>Lemna</i>      | <i>turionifera</i> | 6619   | North America    | USA            | California, Madera Co., Averill Ranch                              | Cs                            |
| <i>Lemna</i>      | <i>japonica</i>    | 8695   | Asia             | Japan          | Kyoto, Yodo                                                        | Cfa                           |
| <i>Lemna</i>      | <i>minor</i>       | 5512   | Asia             | Japan          | Sapporo, small pond in the botanical garden of Hokkaido University | Df                            |
| <i>Lemna</i>      | <i>disperma</i>    | 7767   | Australia        | Australia      | Western Australia, King River                                      | Cs                            |
| <i>Lemna</i>      | <i>gibba</i>       | 7741   | Europe           | Italy          | Sicilia, Siracusa                                                  | Cs                            |
| <i>Lemna</i>      | <i>valdiviana</i>  | 9475   | South America    | Brazil         | Manaus                                                             | Am                            |
| <i>Lemna</i>      | <i>minuta</i>      | 9476   | Europe           | United Kingdom | England, Gloster                                                   | Cfb                           |

## Supporting information

Fig. S1 Morphological characteristics of the genus *Wolffiella*.

Fig. S2 Morphological characteristics of the genus *Lemna*.

Fig. S3 Bioluminescence of *AtCCR2::LUC+* under constant light conditions at various temperatures.

Fig. S4 Comparison of growth at different temperatures.

Fig. S5 Bioluminescence of *AtCCA1::LUC+* under 12-h dark/12-h light conditions at 30 °C.

Table S1 Circadian rhythm stability of duckweed plants under each experimental condition.

Table S2 Correspondence between the Köppen climate classification of duckweed plants and circadian rhythm stability under each experimental condition.

**Fig. S1** Morphological characteristics of the genus *Wolffiella*. (a) *W. lingulata*, (b) *W. oblonga*, (c) *W. caudata*, (d) *W. neotropica*, (e) *W. welwitschii*, (f) *W. hyalina*, and (g) *W. repanda*. Scale bar = 1 cm.

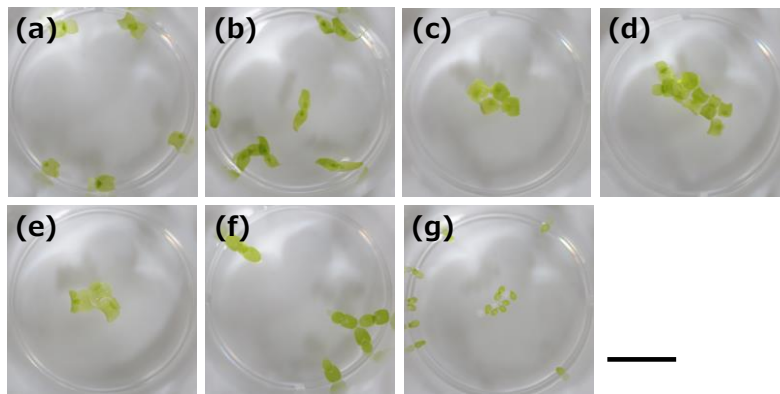

**Fig. S2** Morphological characteristics of the genus *Lemna*. (a) *L. obscura*, (b) *L. turionifera*, (c) *L. japonica*, (d) *L. minor*, (e) *L. disperma*, (f) *L. gibba*, (g) *L. valdiviana* and (h) *L. minuta*. Scale bar = 1 cm.

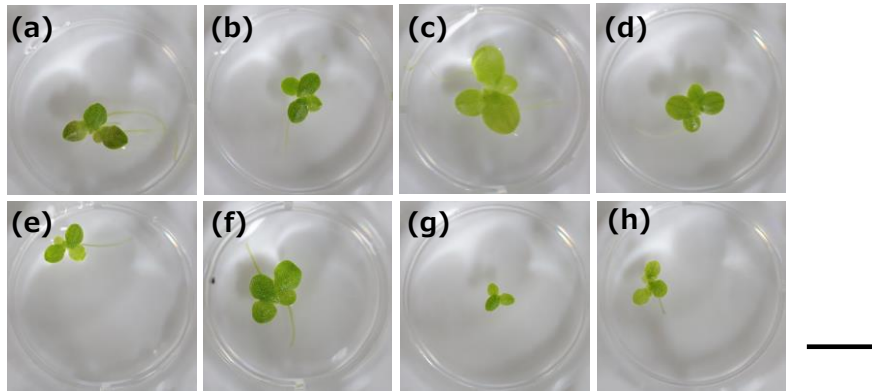

**Fig. S3** Bioluminescence of *AtCCR2::LUC+* under constant light conditions at various temperatures. *AtCCR2::LUC+* was introduced into (a) *W. lingulata*, (b) *W. oblonga*, (c) *W. caudata*, (d) *W. neotropica*, (e) *W. welwitschii*, (f) *W. hyalina*, and (g) *W. repanda*. Red, green, and blue colors indicate 30, 25, and 20 ° C, respectively. Plants cultured in NF medium under constant light conditions were subjected to gene transfection and then entrained to two 12-h dark/12-h light cycles and released into constant light conditions; white and black bars indicate light and dark periods, respectively. The representative time-series data of two replicates in one experiment are shown for each species/condition. The data are presented as relative values with the highest value between 12 h and 36 h set to 1.

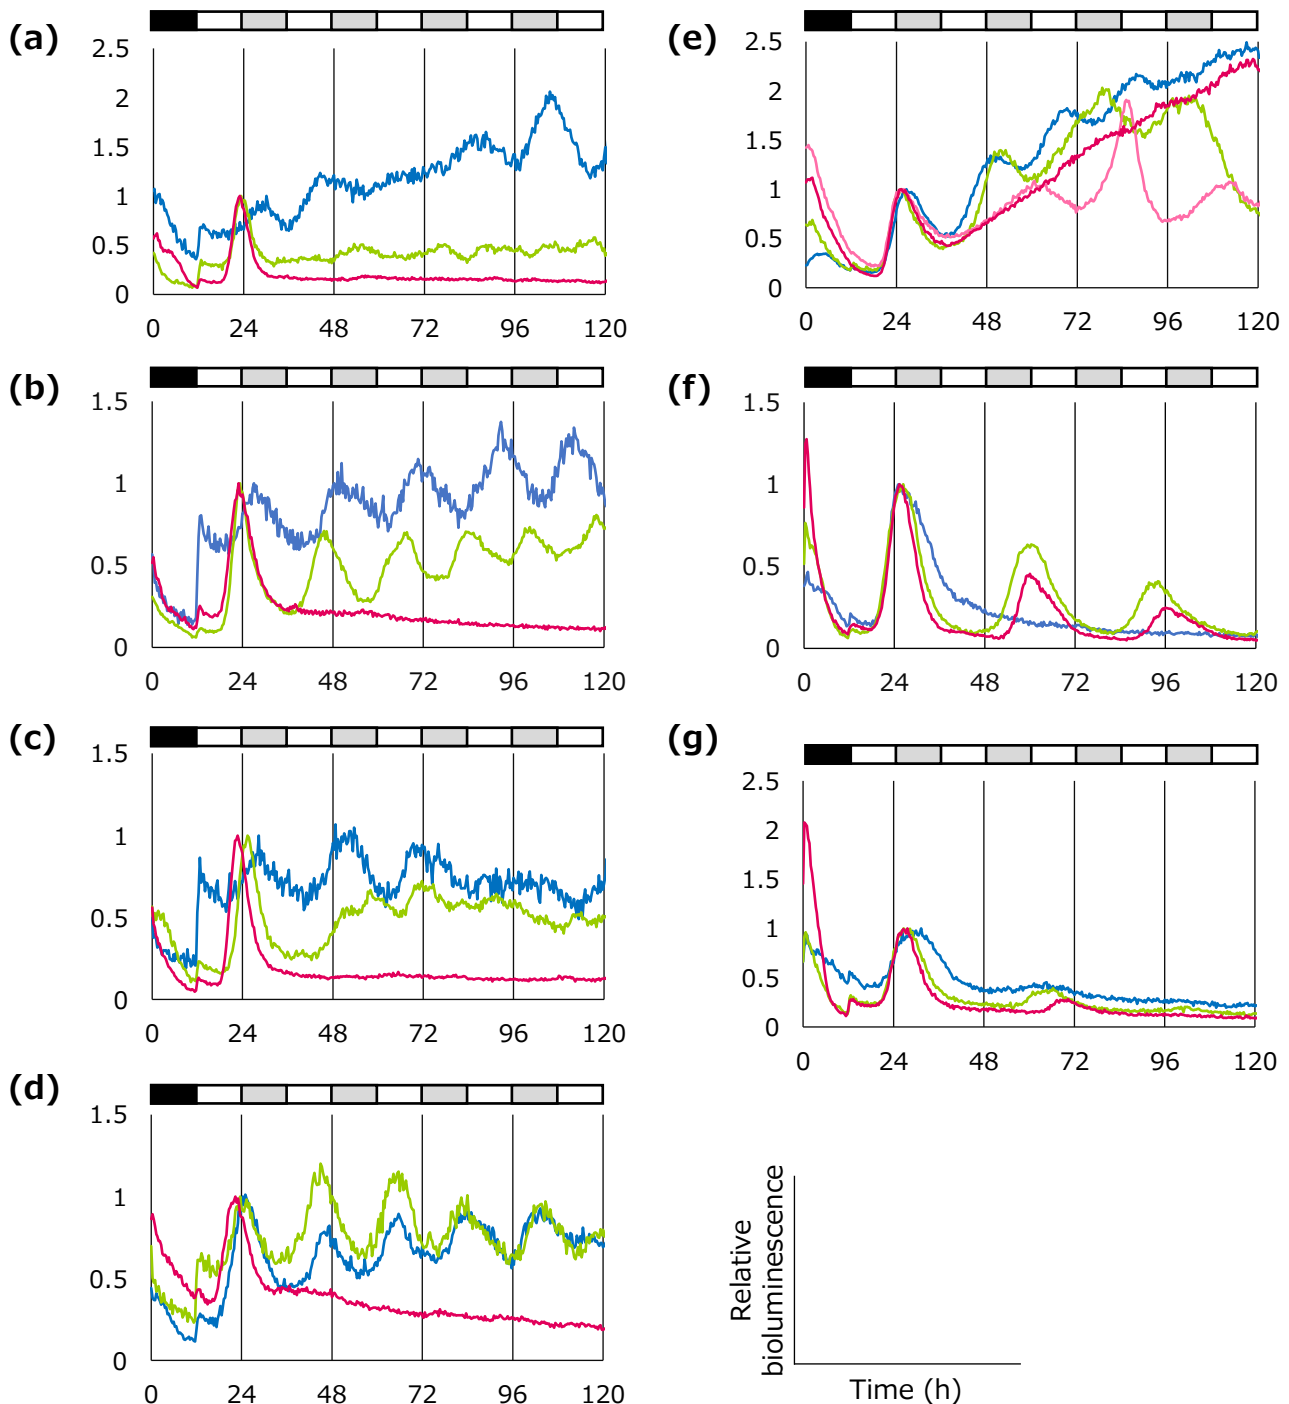

**Fig. S4** Comparison of growth at different temperatures. Plants were precultured in 12-h light/12-h dark conditions for two days at 20, 25, and 30 ° C. After preculture, plants were placed in 12-well plates (one colony per well) and grown under constant light conditions at each temperature. After one week, the number of plant colonies in each well was counted. Data represent mean  $\pm$  SD ( $n = 3$ ). The red, green, and blue colors indicate 30, 25, and 20 ° C, respectively.

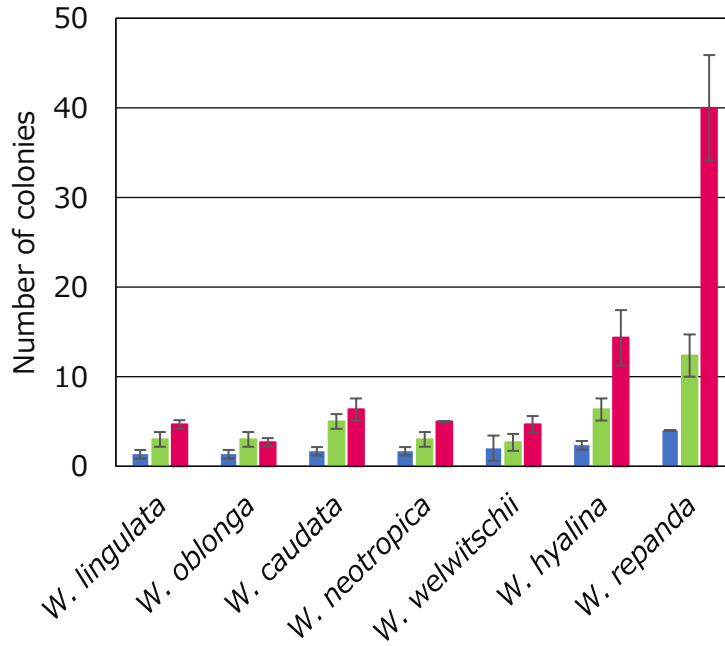

**Fig. S5** Bioluminescence of *AtCCA1::LUC+* under 12-h dark/12-h light conditions at 30 ° C. *AtCCA1::LUC+* was introduced into (a) *W. lingulata*, (b) *W. oblonga*, (c) *W. caudata*, (d) *W. neotropica*, (e) *W. welwitschii*, (f) *W. hyalina*, and (g) *W. repanda*. Plants cultured in NF medium under constant light conditions were subjected to gene transfection, and bioluminescence rhythms were measured under 12-h dark/12-h light conditions at 30 ° C. White and black bars indicate light and dark periods, respectively. The representative time-series data of three replicates in one experiment are shown for each species/condition.

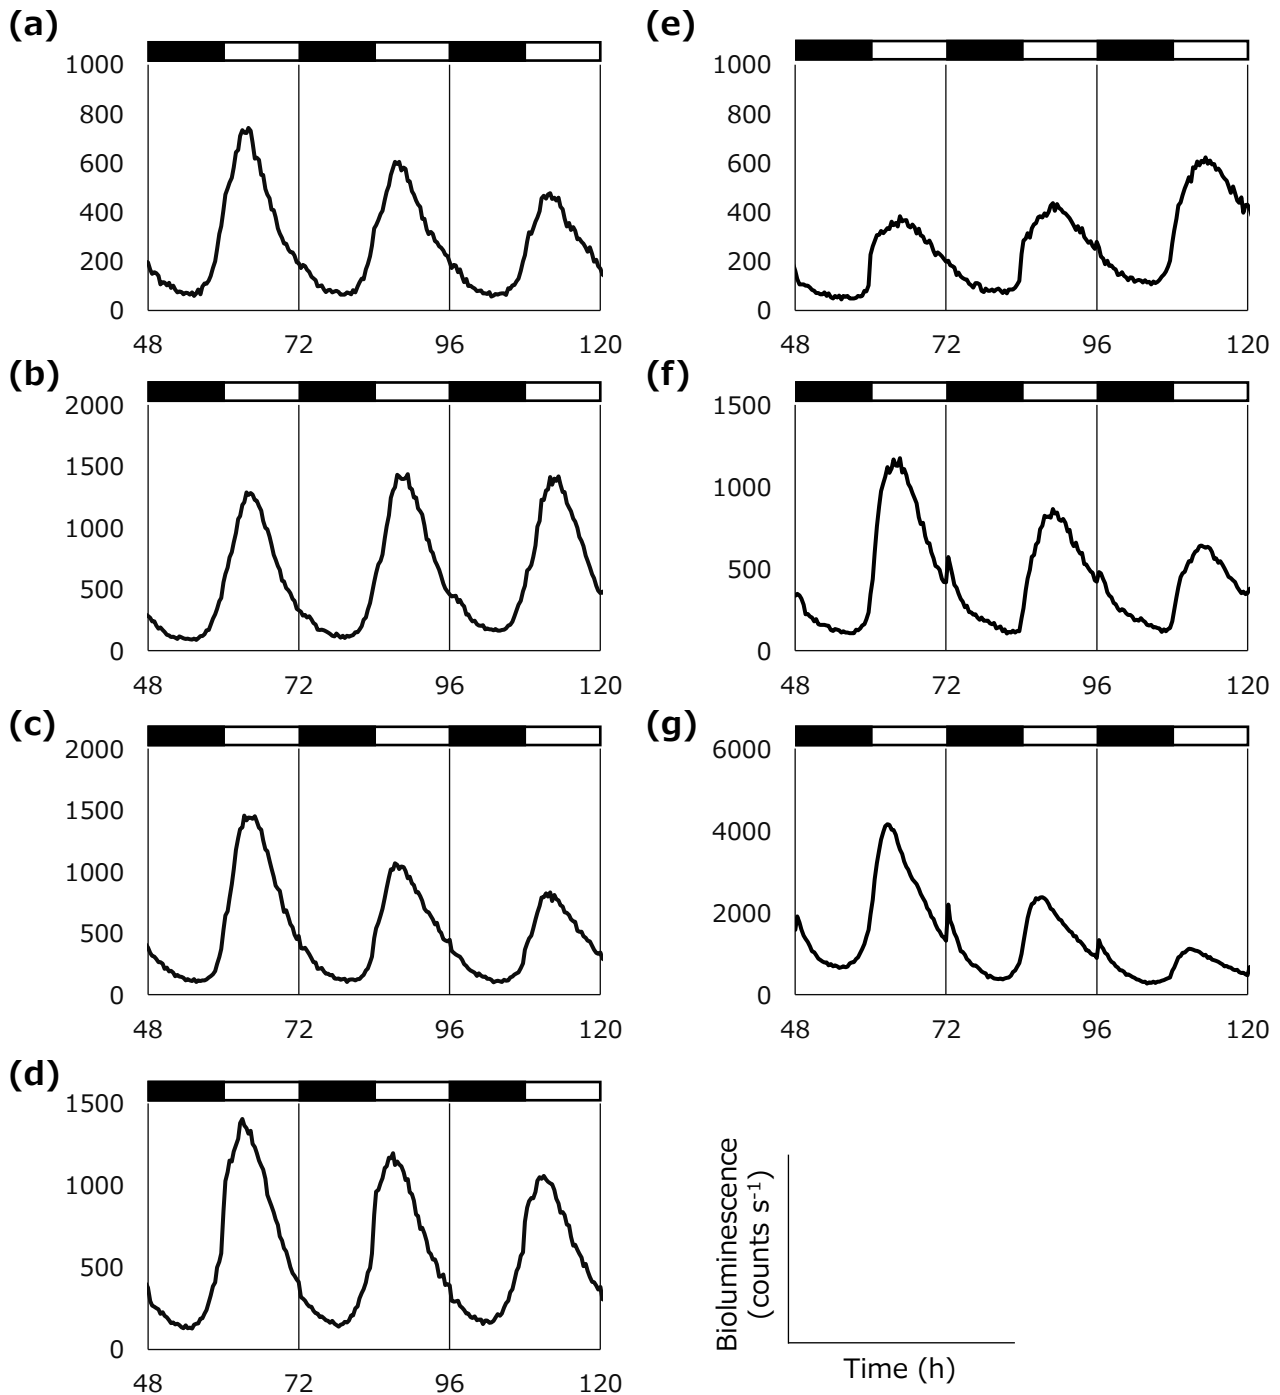

**Table S1** Circadian rhythm stability of duckweed plants under each experimental condition.

| Species               | 20°C |    | 25°C |    | 30°C |    |
|-----------------------|------|----|------|----|------|----|
|                       | LL   | DD | LL   | DD | LL   | DD |
| <i>W. lingulata</i>   | R    | D  | D    | R  | AR   | R  |
| <i>W. oblonga</i>     | R    | D  | R    | R  | D    | R  |
| <i>W. caudata</i>     | R    | D  | D    | R  | AR   | R  |
| <i>W. neotropica</i>  | D    | D  | R    | R  | AR   | R  |
| <i>W. welwitschii</i> | D    | D  | R    | R  | AR   | R  |
| <i>W. hyalina</i>     | D    | D  | R    | R  | R    | R  |
| <i>W. repanda</i>     | D    | D  | R    | R  | D    | R  |
| <i>L. obscura</i>     | D    | R  | R    | R  | R    | R  |
| <i>L. turionifera</i> | D    | R  | R    | D  | R    | R  |
| <i>L. japonica</i>    | D    | R  | R    | R  | R    | R  |
| <i>L. minor</i>       | D    | R  | R    | R  | R    | R  |
| <i>L. disperma</i>    | R    | R  | R    | R  | R    | R  |
| <i>L. gibba</i>       | R    | R  | R    | R  | R    | R  |
| <i>L. valdiviana</i>  | D    | D  | R    | R  | D    | D  |
| <i>L. minuta</i>      | R    | D  | R    | R  | D    | R  |

AR: arrhythmic, D: dampened rhythm, R: rhythmic



**Table S2** Correspondence between the Köppen climate classification of duckweed plants and circadian rhythm stability under each experimental condition.

| Species               | Köppen climate classification | 20°C |    | 25°C |    | 30°C |    |
|-----------------------|-------------------------------|------|----|------|----|------|----|
|                       |                               | LL   | DD | LL   | DD | LL   | DD |
| <i>W. neotropica</i>  | Aw                            | D    | D  | R    | R  | AR   | R  |
| <i>W. caudata</i>     | Am                            | R    | D  | D    | R  | AR   | R  |
| <i>L. valdiviana</i>  | Am                            | D    | D  | R    | R  | D    | D  |
| <i>W. hyalina</i>     | BS                            | D    | D  | R    | R  | R    | R  |
| <i>W. repanda</i>     | BS                            | D    | D  | R    | R  | D    | R  |
| <i>W. welwitschii</i> | BW                            | D    | D  | R    | R  | AR   | R  |
| <i>W. oblonga</i>     | Cfa                           | R    | D  | R    | R  | D    | R  |
| <i>L. obscura</i>     | Cfa                           | D    | R  | R    | R  | R    | R  |
| <i>L. japonica</i>    | Cfa                           | D    | R  | R    | R  | R    | R  |
| <i>L. minuta</i>      | Cfb                           | R    | D  | R    | R  | D    | R  |
| <i>W. lingulata</i>   | Cs                            | R    | D  | D    | R  | AR   | R  |
| <i>L. turionifera</i> | Cs                            | D    | R  | R    | D  | R    | R  |
| <i>L. disperma</i>    | Cs                            | R    | R  | R    | R  | R    | R  |
| <i>L. gibba</i>       | Cs                            | R    | R  | R    | R  | R    | R  |
| <i>L. minor</i>       | Df                            | D    | R  | R    | R  | R    | R  |

AR: arrhythmic, D: dampened rhythm, R: rhythmic
